# Supplementary material for: Lost in the loop - a qualitative study on patient experiences of care in standardized cancer patient pathways
Source: PubMed Central journal article supplement (PMC10702039; doi:10.1186/s12913-023-10364-3), 2023-12-07
Supplement: 12913_2023_10364_MOESM1_ESM.pdf [file 12913_2023_10364_MOESM1_ESM.pdf]

## COREQ (COnsolidated criteria for REporting Qualitative research) Checklist

A checklist of items that should be included in reports of qualitative research. You must report the page number in your manuscript where you consider each of the items listed in this checklist. If you have not included this information, either revise your manuscript accordingly before submitting or note N/A.

| Topic                                          | Item No. | Guide Questions/Description                                                                                                                | Reported on Page No.                                                                                     |
|------------------------------------------------|----------|--------------------------------------------------------------------------------------------------------------------------------------------|----------------------------------------------------------------------------------------------------------|
| <b>Domain 1: Research team and reflexivity</b> |          |                                                                                                                                            |                                                                                                          |
| <i>Personal characteristics</i>                |          |                                                                                                                                            |                                                                                                          |
| Interviewer/facilitator                        | 1        | Which author/s conducted the interview or focus group?                                                                                     | Datacollection<br>Page 9,<br>paragraph 2<br>Study<br>Limitation &<br>Strengths<br>Page 27<br>Paragraph 2 |
| Credentials                                    | 2        | What were the researcher's credentials? E.g. PhD, MD                                                                                       | Limitation &<br>Strengths<br>Page 27<br>Paragraph 2                                                      |
| Occupation                                     | 3        | What was their occupation at the time of the study?                                                                                        | Study<br>Limitations<br>and Strengths<br>Page 27<br>Paragraph 2                                          |
| Gender                                         | 4        | Was the researcher male or female?                                                                                                         | Study<br>Limitations<br>and Strengths<br>Page 27<br>Paragraph 2                                          |
| Experience and training                        | 5        | What experience or training did the researcher have?                                                                                       | Study<br>limitations<br>and strengths<br>Page 27<br>paragraph 2                                          |
| <i>Relationship with participants</i>          |          |                                                                                                                                            |                                                                                                          |
| Relationship established                       | 6        | Was a relationship established prior to study commencement?                                                                                | Recruitment<br>and<br>participant<br>Page 8<br>Paragraph 1                                               |
| Participant knowledge of the interviewer       | 7        | What did the participants know about the researcher? e.g. personal goals, reasons for doing the research                                   | Recruitment<br>and<br>participant<br>Page 8<br>Paragraph 1                                               |
| Interviewer characteristics                    | 8        | What characteristics were reported about the inter viewer/facilitator? e.g. Bias, assumptions, reasons and interests in the research topic | Recruitment<br>and<br>participant                                                                        |

|                                       |    |                                                                                                                                                          |                                                        |
|---------------------------------------|----|----------------------------------------------------------------------------------------------------------------------------------------------------------|--------------------------------------------------------|
|                                       |    |                                                                                                                                                          | Page 8<br>Paragraph 1                                  |
| <b>Domain 2: Study design</b>         |    |                                                                                                                                                          |                                                        |
| <i>Theoretical framework</i>          |    |                                                                                                                                                          |                                                        |
| Methodological orientation and Theory | 9  | What methodological orientation was stated to underpin the study? e.g. grounded theory, discourse analysis, ethnography, phenomenology, content analysis | Design<br>Page 7<br>Paragraph 1                        |
| <i>Participant selection</i>          |    |                                                                                                                                                          |                                                        |
| Sampling                              | 10 | How were participants selected? e.g. purposive, convenience, consecutive, snowball                                                                       | Recruitment and participation<br>Page 8<br>Paragraph 1 |
| Method of approach                    | 11 | How were participants approached? e.g. face-to-face, telephone, mail, email                                                                              | Recruitment and participation<br>Page 8<br>Paragraph 1 |
| Sample size                           | 12 | How many participants were in the study?                                                                                                                 | Recruitment and participation<br>Page 8<br>Paragraph 1 |
| Non-participation                     | 13 | How many people refused to participate or dropped out? Reasons?                                                                                          | Recruitment and participation<br>Page 8<br>Paragraph 1 |
| <i>Setting</i>                        |    |                                                                                                                                                          |                                                        |
| Setting of data collection            | 14 | Where was the data collected? e.g. home, clinic, workplace                                                                                               | Data collection<br>Page 10<br>Paragraph 3              |
| Presence of nonparticipants           | 15 | Was anyone else present besides the participants and researchers?                                                                                        | Data Collection<br>Page 10<br>Paragraph 3              |
| Description of sample                 | 16 | What are the important characteristics of the sample? e.g. demographic data, date                                                                        | Recruitment and participation<br>Page 8-9<br>Table 1   |
| <i>Data collection</i>                |    |                                                                                                                                                          |                                                        |
| Interview guide                       | 17 | Were questions, prompts, guides provided by the authors? Was it pilot tested?                                                                            | Data collection<br>Page 9<br>Paragraph 1               |
| Repeat interviews                     | 18 | Were repeat inter views carried out? If yes, how many?                                                                                                   | Data Collection<br>Page 9-10<br>Paragraph 2            |

|                                        |    |                                                                                                                                    |                                                                 |
|----------------------------------------|----|------------------------------------------------------------------------------------------------------------------------------------|-----------------------------------------------------------------|
|                                        |    |                                                                                                                                    | page 10<br>table 2                                              |
| Audio/visual recording                 | 19 | Did the research use audio or visual recording to collect the data?                                                                | Data<br>Collection<br>page 10<br>paragraph 3                    |
| Field notes                            | 20 | Were field notes made during and/or after the inter view or focus group?                                                           | N/A                                                             |
| Duration                               | 21 | What was the duration of the inter views or focus group?                                                                           | Data<br>Collection<br>Page 10<br>Paragraph 3                    |
| Data saturation                        | 22 | Was data saturation discussed?                                                                                                     | N/A                                                             |
| Transcripts returned                   | 23 | Were transcripts returned to participants for comment and/or                                                                       | N/A                                                             |
|                                        |    | correction?                                                                                                                        |                                                                 |
| <b>Domain 3: analysis and findings</b> |    |                                                                                                                                    |                                                                 |
| <i>Data analysis</i>                   |    |                                                                                                                                    |                                                                 |
| Number of data coders                  | 24 | How many data coders coded the data?                                                                                               | Study<br>Limitations<br>and strengths<br>Page 27<br>Paragraph 2 |
| Description of the coding tree         | 25 | Did authors provide a description of the coding tree?                                                                              | Data analysis<br>Page 11-12<br>Paragraph 3                      |
| Derivation of themes                   | 26 | Were themes identified in advance or derived from the data?                                                                        | Data analysis<br>Page 11-12<br>Paragraph 3                      |
| Software                               | 27 | What software, if applicable, was used to manage the data?                                                                         | N/A                                                             |
| Participant checking                   | 28 | Did participants provide feedback on the findings?                                                                                 | N/A                                                             |
| <i>Reporting</i>                       |    |                                                                                                                                    |                                                                 |
| Quotations presented                   | 29 | Were participant quotations presented to illustrate the themes/findings?<br>Was each quotation identified? e.g. participant number | Results<br>Page 12-20                                           |
| Data and findings consistent           | 30 | Was there consistency between the data presented and the findings?                                                                 | Results<br>Page 12-20                                           |
| Clarity of major themes                | 31 | Were major themes clearly presented in the findings?                                                                               | Results<br>Page 12<br>Paragraph 1                               |
| Clarity of minor themes                | 32 | Is there a description of diverse cases or discussion of minor themes?                                                             | N/A                                                             |

Developed from: Tong A, Sainsbury P, Craig J. Consolidated criteria for reporting qualitative research (COREQ): a 32-item checklist for interviews and focus groups. *International Journal for Quality in Health Care*. 2007. Volume 19, Number 6: pp. 349 – 357

**Once you have completed this checklist, please save a copy and upload it as part of your submission. DO NOT include this checklist as part of the main manuscript document. It must be uploaded as a separate file.**
